# Supplementary material for: A new residue method for the determination of flonicamid in agricultural and environmental samples using enzyme immunoassay systems
Source: Royal Society of Chemistry journal article supplement (doi:10.1039/c5ra27425g), 2016-01-01
Supplement: c5ra27425g1.pdf [file c5ra27425g1.pdf]

### Supplementary data

**Fig. S1** The ultraviolet adsorption spectra of hapten, BSA, OVA and the conjugate.

**Fig. S2** GC chromatography of flonicamid standard ( $1 \text{ mg L}^{-1}$ ).

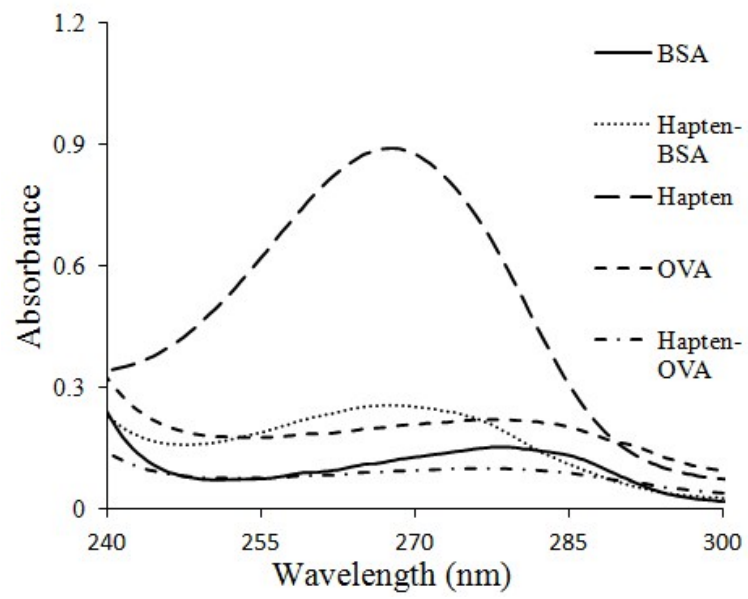

**Fig. S1**

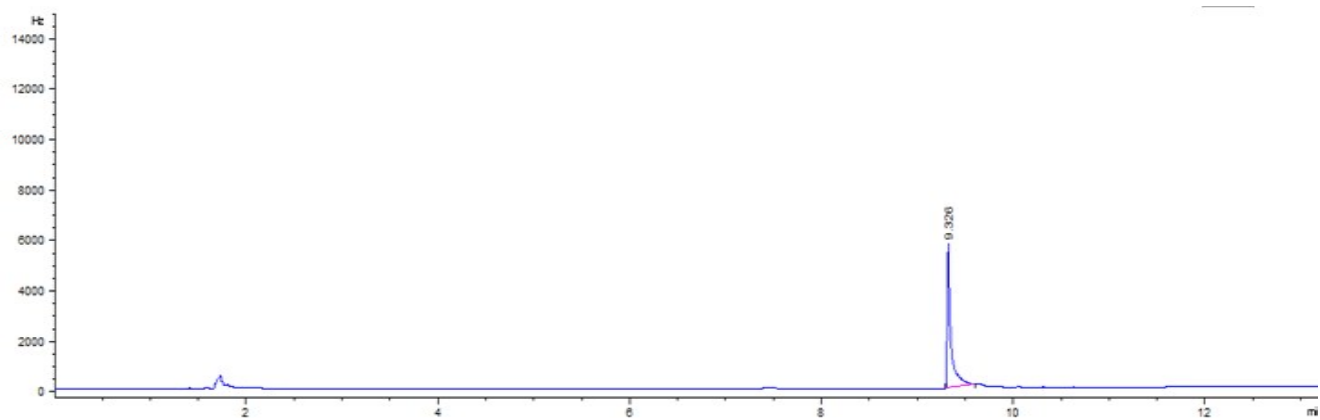

**Fig. S2**
